# Supplementary material for: Using the Goal Attainment Scale adapted for depression to better understand treatment outcomes in patients with major depressive disorder switching to vortioxetine: a phase 4, single-arm, open-label, multicenter study
Source: Springer Nature journal article supplement (doi:10.1186/s12888-021-03608-1), 2021-12-01
Supplement: MOESM1 [file 19950760]

## SUPPLEMENTARY MATERIAL

### Supplementary Figure 1. GAS-D score formula

The formula to calculate overall GAS-D score was as follows:

$$\text{GAS Score} = 50 + \frac{10 * \sum (w_i x_i)}{\sqrt{0.7 * \sum w_i^2 + 0.3 * (\sum w_i^2)}}$$

$w_i$ , goal weight;  $x_i$ , numerical outcome for individual goal

Abbreviation: GAS-D, Goal Attainment Scale Adapted for Depression.

**Supplementary Figure 2.** Change in overall Q-LES-Q scores from baseline

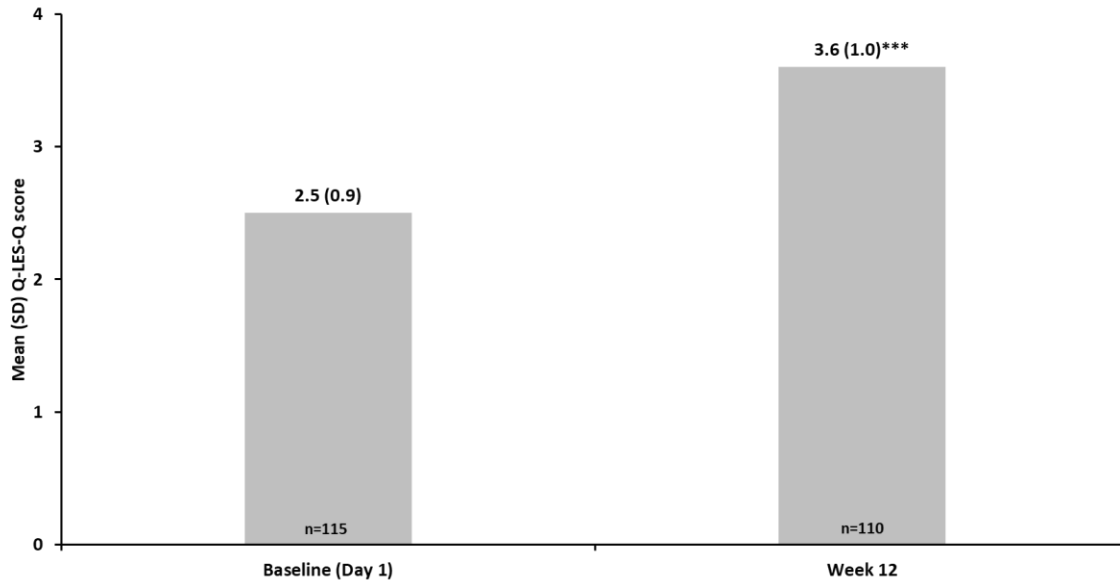

\*\*\* $P < 0.001$  for change from baseline

Abbreviations: Q-LES-Q, Quality of Life Enjoyment and Satisfaction Questionnaire; SD, standard deviation.

**Supplementary Figure 3.** Change in LEAPS score from baseline

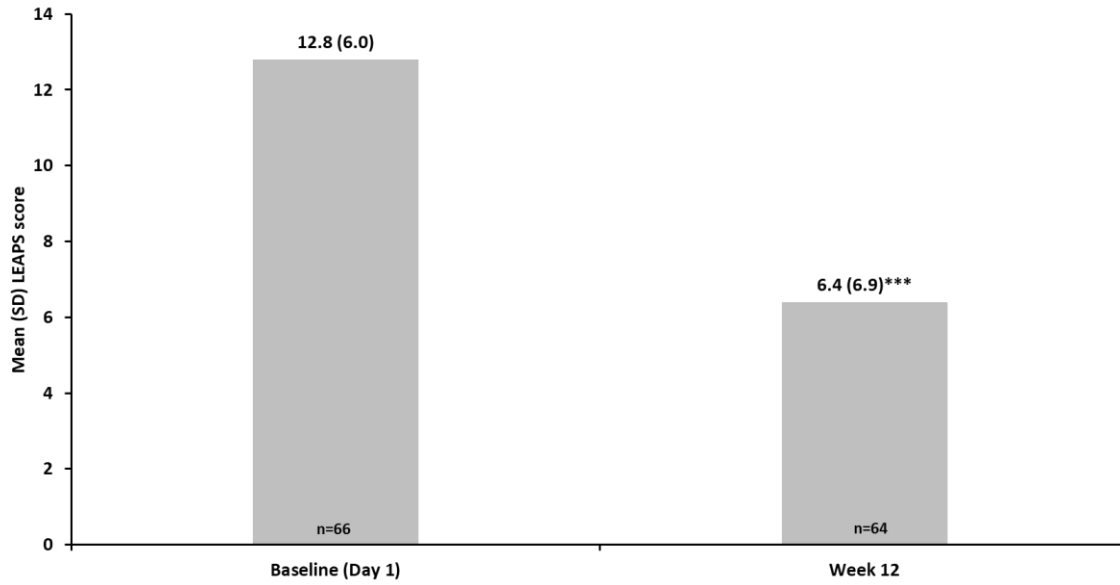

\*\*\* $P < 0.001$  for change from baseline

Abbreviations: LEAPS, Lam Employment Absence and Productivity Scale; SD, standard deviation.
